# Supplementary material
Source: publisher figshare collection journal article supplement (https://wiley.figshare.com/articles/dataset/_/4872008)
Supplement: Supplementary file 1 [file 1]

Archive with 14 entries (14 files):
- AirwaySlice.pdf
- zdg-JAPPL-00036-2017-s08.mp4
- zdg-JAPPL-00036-2017-s07.mp4
- zdg-JAPPL-00036-2017-s06.mp4
- zdg-JAPPL-00036-2017-s05.mp4
- zdg-JAPPL-00036-2017-s04.mp4
- zdg-JAPPL-00036-2017-s03.mp4
- zdg-JAPPL-00036-2017-s02.mp4
- zdg-JAPPL-00036-2017-s01.mp4
- supplement.pdf
- appendices.pdf
- supplement.tex
- appendices.tex
- zdg-JAPPL-00036-2017-s09.mp4
