# Supplementary material
Source: publisher figshare collection journal article supplement (https://wiley.figshare.com/articles/dataset/_/4872008)
Supplement: Supplementary file 1 [file 1 › appendices.tex]

\documentclass[12pt,letterpaper,]{article}
\usepackage{lmodern}
\usepackage{setspace}
\setstretch{1.5}
\usepackage{amssymb,amsmath}
\usepackage{ifxetex,ifluatex}
\usepackage{fixltx2e} % provides \textsubscript
\ifnum 0\ifxetex 1\fi\ifluatex 1\fi=0 % if pdftex
  \usepackage[T1]{fontenc}
  \usepackage[utf8]{inputenc}
\else % if luatex or xelatex
  \ifxetex
    \usepackage{mathspec}
  \else
    \usepackage{fontspec}
  \fi
  \defaultfontfeatures{Ligatures=TeX,Scale=MatchLowercase}
\fi
% use upquote if available, for straight quotes in verbatim environments
\IfFileExists{upquote.sty}{\usepackage{upquote}}{}
% use microtype if available
\IfFileExists{microtype.sty}{%
\usepackage{microtype}
\UseMicrotypeSet[protrusion]{basicmath} % disable protrusion for tt fonts
}{}
\usepackage[margin=1in]{geometry}
\usepackage{hyperref}
\hypersetup{unicode=true,
            pdftitle={Bayesian estimation of physiological parameters governing a dynamic two-compartment model of exhaled nitric oxide},
            pdfauthor={Patrick Muchmore¹*; Edward B. Rappaport¹; Sandrah P. Eckel¹},
            pdfborder={0 0 0},
            breaklinks=true}
\urlstyle{same}  % don't use monospace font for urls
\usepackage{graphicx,grffile}
\makeatletter
\def\maxwidth{\ifdim\Gin@nat@width>\linewidth\linewidth\else\Gin@nat@width\fi}
\def\maxheight{\ifdim\Gin@nat@height>\textheight\textheight\else\Gin@nat@height\fi}
\makeatother
% Scale images if necessary, so that they will not overflow the page
% margins by default, and it is still possible to overwrite the defaults
% using explicit options in \includegraphics[width, height, ...]{}
\setkeys{Gin}{width=\maxwidth,height=\maxheight,keepaspectratio}
\IfFileExists{parskip.sty}{%
\usepackage{parskip}
}{% else
\setlength{\parindent}{0pt}
\setlength{\parskip}{6pt plus 2pt minus 1pt}
}
\setlength{\emergencystretch}{3em}  % prevent overfull lines
\providecommand{\tightlist}{%
  \setlength{\itemsep}{0pt}\setlength{\parskip}{0pt}}
\setcounter{secnumdepth}{0}
% Redefines (sub)paragraphs to behave more like sections
\ifx\paragraph\undefined\else
\let\oldparagraph\paragraph
\renewcommand{\paragraph}[1]{\oldparagraph{#1}\mbox{}}
\fi
\ifx\subparagraph\undefined\else
\let\oldsubparagraph\subparagraph
\renewcommand{\subparagraph}[1]{\oldsubparagraph{#1}\mbox{}}
\fi
\setallmainfonts{Times New Roman}
%\usepackage[mathlines]{lineno}
%\def\linenumberfont{\normalfont\tiny\rmfamily}
%\linenumbers
\usepackage{fancyhdr}
\pagestyle{fancy}
\fancyhead[R]{\thepage}
\fancyhead[L]{Bayesian parameter estimation for a dynamic model of $\feno$}
\fancyfoot{}
\usepackage[width=5in]{caption}
\captionsetup[figure]{name=Fig.}
\usepackage{booktabs}
\usepackage{xcolor}
\usepackage{soul}
\usepackage[nofiglist,notablist]{endfloat}
\usepackage{subfig}
\AtBeginDocument{%
\renewcommand*\figurename{Figure}
\renewcommand*\tablename{Table}
}
\AtBeginDocument{%
\renewcommand*\listfigurename{List of Figures}
\renewcommand*\listtablename{List of Tables}
}
\usepackage{float}
\floatstyle{ruled}
\makeatletter
\@ifundefined{c@chapter}{\newfloat{codelisting}{h}{lop}}{\newfloat{codelisting}{h}{lop}[chapter]}
\makeatother
\floatname{codelisting}{Listing}
\newcommand*\listoflistings{\listof{codelisting}{List of Listings}}

%%% Use protect on footnotes to avoid problems with footnotes in titles
\let\rmarkdownfootnote\footnote%
\def\footnote{\protect\rmarkdownfootnote}

%%% Change title format to be more compact
\usepackage{titling}

% Create subtitle command for use in maketitle
\newcommand{\subtitle}[1]{
  \posttitle{
    \begin{center}\large#1\end{center}
    }
}

\begin{document}

\newcommand{\zzero}{\mathit{z}_0}
\newcommand{\zmouth}{\mathit{z}_\mathrm{mouth}}
\newcommand{\zalv}{\mathit{z}_\mathrm{alv}} 
\newcommand{\tsub}[1]{\mathit{t}_\mathit{#1}}
\newcommand{\csub}[1]{\mathit{c}_\mathit{#1}}
\newcommand{\cof}[2]{\mathit{c(#1,#2)}}
\newcommand{\cofzt}{\cof{z}{t}}
\newcommand{\cofzzeroti}{\mathit{c(\zzero,\tsub{i})}}
\newcommand{\chat}[1]{\hat{\mathit{c}}_\mathit{#1}}
\newcommand{\ctilde}[1]{\tilde{\mathit{c}}_\mathit{#1}}
\newcommand{\voft}{\mathit{v(t)}}
\newcommand{\vhatoft}{\hat{\mathit{v}}\mathit{(t)}}
\newcommand{\diff}{\mathit{d}}
\newcommand{\perm}{\mathit{p}}
\newcommand{\cw}{\csub{w}}
\newcommand{\rad}{\mathit{r}}
\newcommand{\len}{\mathit{l}}
\newcommand{\cano}{\mathrm{Cᴀ_{NO}}}
\newcommand{\feno}{\mathrm{Fᴇ_{NO}}}
\newcommand{\fenoFifty}{\mathrm{Fᴇ_{NO,50}}}
\newcommand{\ceno}{\mathrm{Cᴇ_{NO}}}
\newcommand{\daw}{\mathrm{Daw_{NO}}}
\newcommand{\caw}{\mathrm{Caw_{NO}}}
\newcommand{\jawPrime}{\mathrm{J'aw_{NO}}}
\newcommand{\Vdot}{\dot{\mathrm{V}}}

\newcommand{\pp}[1]{(\partial/\partial #1)}
\newcommand{\ppn}[2]{(\partial^{#2}/\partial {#1}^{#2})}
\newcommand{\timesTenTo}[1]{\times 10^{#1}}

\newcommand{\steadystatesolution}{\jawPrime/\daw+(\cano-\jawPrime/\daw)\exp(-\daw/\Vdot)}
\newcommand{\fof}[1]{"f(#1)}
\newcommand{\fgiven}[2]{"f(#1|#2)}

\newcommand{\pvalue}{$p$-$value$ }
\newcommand{\freqInt}{\textit{conf}}
\newcommand{\bayesInt}{\textit{cred}}

\newcommand{\appendixTitle}[1]{Appendix #1}
\newcommand{\modelAppendix}{\appendixTitle{A}}
\newcommand{\numericalAppendix}{\appendixTitle{B}}
\newcommand{\mcmcAppendix}{\appendixTitle{C}}

\newcommand{\RevisedAdded}[1]{{#1}}
\newcommand{\RevisedRemoved}[1]{}


\section{Appendix A: Model
description}\label{appendix-a-model-description}

The airway is assumed to be a cylinder with constant radius \(\rad\) and
constant length \(\len\) (one or both may be implicitly defined by
specifying the airway volume \(\pi\rad^2\len\) and/or surface area
\(2\pi\rad\len\)). The model (Eq. 1) results from imposing
conservation of (NO) mass throughout this domain. That is, for any time
interval \((t,t+\Delta t)\), we assume any net change in mass inside an
arbitrary region \((z,z+\Delta z)\) equals the net mass passing through
the regions's boundary over the same time interval.

\begin{figure}
\centering
\includegraphics[width=2.00000in]{AirwaySlice.pdf}
\caption{For an arbitrary airway segment of length \(\Delta z\), and an
arbitrary time interval of length \(\Delta t\), we assume any net change
in mass inside the segment must equal the net mass passing through the
boundary. As illustrated here, air moves vertically through the airway
during exhalation; therefore, the net change due to advection (flow)
represents the difference between the mass entering through the lower
boundary and exiting through the upper boundary. The airway wall is also
assumed to be permeable to NO. Depending on the relative concentrations
of the airway wall \(\cw\) and the alveolar compartment \(c(\zalv,t)\),
it will serve as either a net source or sink of NO. Typically,
\(\cw>\cofzt\), yielding a net diffusion of NO from the airway wall to
lumen (as pictured here). This also implies that the concentration in
the lumen will increase as air moves vertically though the airway, i.e.
\(c(z+\Delta z, t) > \cofzt\). This concentration gradient results in
net NO diffusion opposite to the direction of flow; therefore, the net
change in mass due to diffusion will be the difference between the mass
diffusing in through the upper boundary and the mass diffusing out
through the lower boundary.}\label{fig:airwaySlice}
\end{figure}

\subsection{Advection of NO axially through the
airway}\label{advection-of-no-axially-through-the-airway}

Over the time interval \((t,t+\Delta t)\), a cross-section of air moving
at \(\voft\) cm/s will travel a distance
\(\Delta z\approx\voft \Delta t\) cm. Therefore, over a time interval of
length \(\Delta t\) the mass that flows into the region through the
lower boundary is approximately \(\voft \Delta t \pi \rad^2 \cofzt\).
Similarly, the mass that flows out of the region through the upper
boundary is approximately
\(\voft \Delta t \pi \rad^2 c(z+\Delta z, t)\), hence the net change in
mass due to advection (flow) is approximately
\(-\voft [c(z+\Delta z, t) - \cofzt]\pi \rad^2 \Delta t\)

\subsection{The airway wall as a source of
NO}\label{the-airway-wall-as-a-source-of-no}

Depending on the concentration, the tissue lining the airway wall can
act as either a source or sink for NO. Typically, we assume the
concentration of NO in the airway wall \(\cw\) exceeds the alveolar
concentration \(c(\zalv,t)\), implying the airway tissue serves as a net
source of NO. The net transfer of NO from tissue to lumen is assumed to
occur at a rate proportional to the concentration difference. Denoting
the proportionality constant by \(\perm\), the flux per unit area is
\(\perm[\cw-\cofzt]\).Therefore, over a time interval of length
\(\Delta t\) the net mass diffusing into the region from the airway wall
is approximately equal to the product
\(\perm[\cw-\cofzt]2\pi \rad \Delta z \Delta t\).

\subsection{Diffusion of NO axially through the
airway}\label{diffusion-of-no-axially-through-the-airway}

Assuming \(\cw>c(\zalv,t)\) implies that during exhalation the
concentration will increase as air moves though the airway, i.e.
\(c(z+\Delta z, t) > \cofzt\). According to Fick's first law, the
diffusive flux per unit area will be proportional to the concentration
gradient \(c_z(z,t):=\pp{z}\cofzt\). Denoting by \(\diff\) the
proportionality constant, over a time interval of length \(\Delta t\)
the mass diffusing into the region will be approximately
\(\diff c_z(z+\Delta z)\pi \rad^2 \Delta t\). Similarly, the mass
diffusing out of the region will be approximately
\(\diff c_z(z,t)\pi \rad^2 \Delta t\), hence the net change in mass due
to (axial) diffusion is approximately
\(\diff[c_z(z+\Delta z,t) - c_z(z,t)]\pi \rad^2 \Delta t\).

Imposing conservation of mass requires that over the time interval
\((t,t+\Delta t)\), the net change inside the region must equal the net
mass passing through the boundary. This implies the approximate equality
\([\cof{z}{t+\Delta t}-\cofzt]\pi \rad^2 \Delta z \approx -\voft [c(z+\Delta z, t) - \cofzt]\pi \rad^2 \Delta t + \diff[c_z(z+\Delta z,t) - c_z(z,t)]\pi \rad^2 \Delta t + \perm[\cw-\cofzt]2\pi \rad \Delta z \Delta t\).
Dividing both sides by \(\pi \rad^2\Delta t \Delta z\) then taking
\(\Delta t, \Delta z \rightarrow 0\) results in the model
(Eq. 1).

\subsection{\texorpdfstring{Eq. 2 as a special case
of
Eq. 1}{Eq.~ as a special case of Eq.~}}\label{eqsteadystate-as-a-special-case-of-eqadrpde}

To transform Eq. 1 into Eq. 2, we begin
by assuming the airway NO concentration has achieved a steady-state, and
thus does not vary through time. Mathematically, this is equivalent to
assuming \(\pp{t}\cofzt=0\), which also implies \(\cofzt=c(z)\). Because
the concentration is flow dependent, a necessary condition for this to
occur is for the velocity to be constant through time, that is
\(\voft=v\). As a further simplification, the diffusivity of NO in air
is assumed to be negligible, i.e. \(d=0\), reducing the problem further
to a first order ordinary differential equation (ODE).

By substituting \(\pp{t}\cofzt = 0\), \(\voft = v\), and \(\diff = 0\)
into equation Eq. 1 it simplifies into
\(0=-vc'(z) + (2\perm/\rad)\cw - (2\perm/\rad)c(z)\). Multiplying
through by the airway volume \(\pi \rad^2 \len\), dividing through by
\(\Vdot \len\), and rearranging terms yields
\(c'(z) + [\daw/(\Vdot \len)] c(z) = \jawPrime/(\Vdot \len)\).
Generically, this is a linear ODE with constant coefficients of the form
\(c'(z) + [a/d]c(z) = b/d\). Using standard techniques for ODEs, such as
separation of variables, the general solution can be shown to be
\(c(z)=b/a + k\exp(-z[a/d])\), where \(k\) is the constant of
integration. Therefore, by making the above simplifying assumptions, the
general solution of (Eq. 1) can be written as
\(c(z)=\jawPrime/\daw+k\exp(-z[\daw/(\Vdot \len)])\).

The constant \(k\) can be found by imposing a boundary condition, and
for consistency with (32) the origin (\(\zzero\)) is shifted from the
sensor to the alveolar boundary. That is, by definition the
concentration at the origin is equal to the alveolar concentration, or
\(c(0)=\cano\). Combining this condition with the general solution above
allows us to solve for the constant, resulting in
\(k=\cano-\jawPrime/\daw\), and hence the particular solution
\(c(z)=\jawPrime/\daw + (\cano-\jawPrime/\daw)\exp(-z[\daw/(\Vdot \len)]).\)

This solution is applicable along the length of the airway from the
alveolar boundary to the mouth, or \(0 \le z \le \len\). Once air enters
the sampling device dead space, both the airway wall concentration and
permeability are assumed to be zero. This is equivalent to assuming
\(c'(z)=0\) in this region, i.e.~there is no spatial variation in the
concentration. This implies the concentration measured at the sensor
equals the concentration measured at the mouth. Mathematically, this
means \(c(\len)=\feno\), and inserting \(z=\len\) and \(c(\len)=\feno\)
into the particular solution yields the equality
(Eq. 2).

\section{Appendix B: Numerical
integration}\label{appendix-b-numerical-integration}

\subsection{Spatial discretizations}\label{spatial-discretizations}

To solve the governing PDE (Eq. 1) numerically, the
spatial \((z)\) derivatives are replaced with finite difference
approximations based on Taylor series expansions. For the diffusive
term, a centered three term Taylor series approximation is employed,
\(\ppn{z}{2} \cofzt \approx [c(z-\Delta z, t) - 2\cofzt + c(z+\Delta z, t)][\Delta z]^{-2}\).
For the advective term, a biased 4 term Taylor series approximation is
employed. The direction of the bias is determined by the direction of
flow, as dictated by the sign of \(\voft\). Specifically, the
approximation is oriented with an ``upwind'' bias; two of the terms in
the approximation are chosen on the side from which the flow originates,
and only one is chosen from the opposite side.

For example, when \(\voft>0\) the approximation is
\(\pp{z} \cofzt \allowbreak \approx \allowbreak [c(z-2\Delta z, t) - 6c(z-\Delta z, t) + 3\cofzt + 2c(z+\Delta z, t)][6\Delta z]^{-1}\).
An upwind discretization is employed because centered discretizations
for advection can lead to spurious oscillations in the numerical
approximation. A completely one-sided discretization can prevent
oscillations; however, despite the formal order of the Taylor series,
such an approximation will always have first order accuracy (16). By
employing a two-sided, but biased, discretization, higher order accuracy
can be achieved while minimizing the potential for oscillatory
solutions.

\subsection{Boundary and initial
conditions}\label{boundary-and-initial-conditions}

For the PDE (Eq. 1) to have a unique solution, initial
(time) and inflow boundary (space) conditions must be specified.
Moreover, the incoming concentration depends on the direction of flow.
During exhalation it corresponds to the alveolar concentration, a
parameter to be estimated. During inhalation this concentration is
typically the ambient NO level; however, during testing subjects may be
provided air that has been ``scrubbed'' of NO.

By definition, modeling \(\feno\) involves modeling exhalation. However,
because respiration is cyclic, the terminal condition in one direction
of flow becomes the initial condition for the reverse flow. This
relationship means that NO measured during exhalation is determined, in
part, by the terminal state of the previous inhalation. In principle,
the previous inhalation depends, in turn, on the preceding exhalation,
which depends on the inhalation before that, continuing ad nauseam.

In practice, higher flow rates diminish this dependence, and at
relatively high rates (300+ ml/s), the terminal airway concentration is
effectively independent of the initial. Although 300 ml/s is a
relatively rapid rate for exhalation, it is a relatively slow rate for
inhalation. For example, in all 900 maneuvers used for simulation this
threshold was cleared every time, typically by factors of at least 2-3x.

The implication of this phenomena is that calculating accurate estimates
of the airway concentration immediately after inhalation does not
require knowing the initial airway concentration when inhalation began.
The solution can be calculated based on a simple initial condition
(i.e.~zero everywhere), and the end result will be essentially
unchanged. The terminal condition will also depend on the inflow
concentration; however, in the case of ``scrubbed'' air this can be
assumed to be zero.

\section{Appendix C: MCMC parameter
estimation}\label{appendix-c-mcmc-parameter-estimation}

We adopt a Bayesian approach to inference (8), and our goal is to
characterize the posterior distribution (generically denoted
\(\fgiven{\theta}{x}\) for parameters \(\theta\) and data \(x\)). Using
Bayes rule, the posterior can be expressed in terms of the likelihood
\(\fgiven{x}{\theta}\) and a prior distribution \(\fof{\theta}\). For
many purposes, including ours, the unnormalized posterior is sufficient,
simplifying the relationship between to the posterior, likelihood, and
prior to the proportionality
\(\fgiven{\theta}{x}\propto \fgiven{x}{\theta}\fof{\theta}\).

Multiple parameterizations of the model (Eq. 1) are
possible; for consistency with Eq. 2, we work with
the vector of parameters \(\theta=(\cano, \jawPrime, \daw)\). The data
for each subject consists of \(x=\{\ctilde{ij}\}\), where
\(\ctilde{ij}\) is the measured concentration at time \(\tsub{i}\)
during maneuver \(j\in 1,2,\ldots,9\).

To formulate a likelihood, we assume that by fixing \(\theta\) and
solving the corresponding model equation, the model solution can be used
to calculate the density of the observed data. If we further assume the
observed values \(\ctilde{ij}\) arise from a shared parametric
conditional distribution with density function \(f\), and that
conditional on the model solutions \(\csub{ij}\) the \(\ctilde{ij}\) are
independent, then the likelihood can be written as
\(\fgiven{x}{\theta} = \prod_i \prod_j \fgiven{\ctilde{ij}}{\csub{ij}}\),
where \(\theta\) appears implicitly on the right via the model solution
\(\csub{ij}\).

When the likelihood \(\fgiven{x}{\theta}\) is combined with a prior
\(\fof{\theta}\), the (unnormalized) posterior can be easily calculated
for any particular set of parameters \(\theta\). To efficiently explore
the posterior distribution we employ a Metropolis-Hastings style MCMC
algorithm (24), which generically proceeds as follows:

\begin{enumerate}
\def\labelenumi{\arabic{enumi}.}
\setcounter{enumi}{-1}
\tightlist
\item
  Select an initial value \(\theta\) and calculate the likelihood
  \(\fgiven{\theta}{x}\).
\item
  Propose a new value \(\theta'\) using a transition kernel
  \(q(\theta \rightarrow \theta')\), and calculate the likelihood
  \(\fgiven{\theta'}{x}\).
\item
  Accept the proposed value with probability
  \(\text{min}\left[1, \frac{\fgiven{x}{\theta'}\fof{\theta'}q(\theta' \rightarrow \theta)} {\fgiven{x}{\theta}\fof{\theta}q(\theta \rightarrow \theta')} \right]\).
\item
  If the proposal is accepted set \(\theta=\theta'\),
  \(\fgiven{\theta}{x}=\fgiven{\theta'}{x}\) then return to 1;
  otherwise, return to 1.
\end{enumerate}

The choice of transition kernel \(q\) can have a significant impact on
the efficiency of this type of algorithm. Finding an optimal \(q\) can
be difficult; however, there are a number of more recent MCMC algorithms
which incorporate an ``adaptive'' transition distribution (25). To
better account for variability in the posterior across individuals, the
adaptive Metropolis algorithm of (12) is employed to automatically
calibrate the proposal distribution against the target. This has the
dual benefit of both increasing the efficiency of our sampler, while
also simplifying the user experience by largely automating the choice of
transition kernel.


\end{document}
