# Supplementary material
Source: publisher figshare collection journal article supplement (https://wiley.figshare.com/articles/dataset/_/4872008)
Supplement: Supplementary file 1 [file 1 › supplement.tex]

\documentclass[12pt,letterpaper,]{article}
\usepackage{lmodern}
\usepackage{setspace}
\setstretch{1.5}
\usepackage{amssymb,amsmath}
\usepackage{ifxetex,ifluatex}
\usepackage{fixltx2e} % provides \textsubscript
\ifnum 0\ifxetex 1\fi\ifluatex 1\fi=0 % if pdftex
  \usepackage[T1]{fontenc}
  \usepackage[utf8]{inputenc}
\else % if luatex or xelatex
  \ifxetex
    \usepackage{mathspec}
  \else
    \usepackage{fontspec}
  \fi
  \defaultfontfeatures{Ligatures=TeX,Scale=MatchLowercase}
\fi
% use upquote if available, for straight quotes in verbatim environments
\IfFileExists{upquote.sty}{\usepackage{upquote}}{}
% use microtype if available
\IfFileExists{microtype.sty}{%
\usepackage{microtype}
\UseMicrotypeSet[protrusion]{basicmath} % disable protrusion for tt fonts
}{}
\usepackage[margin=1in]{geometry}
\usepackage{hyperref}
\hypersetup{unicode=true,
            pdftitle={Bayesian estimation of physiological parameters governing a dynamic two-compartment model of exhaled nitric oxide},
            pdfauthor={Patrick Muchmore¹*; Edward B. Rappaport¹; Sandrah P. Eckel¹},
            pdfborder={0 0 0},
            breaklinks=true}
\urlstyle{same}  % don't use monospace font for urls
\usepackage{graphicx,grffile}
\makeatletter
\def\maxwidth{\ifdim\Gin@nat@width>\linewidth\linewidth\else\Gin@nat@width\fi}
\def\maxheight{\ifdim\Gin@nat@height>\textheight\textheight\else\Gin@nat@height\fi}
\makeatother
% Scale images if necessary, so that they will not overflow the page
% margins by default, and it is still possible to overwrite the defaults
% using explicit options in \includegraphics[width, height, ...]{}
\setkeys{Gin}{width=\maxwidth,height=\maxheight,keepaspectratio}
\IfFileExists{parskip.sty}{%
\usepackage{parskip}
}{% else
\setlength{\parindent}{0pt}
\setlength{\parskip}{6pt plus 2pt minus 1pt}
}
\setlength{\emergencystretch}{3em}  % prevent overfull lines
\providecommand{\tightlist}{%
  \setlength{\itemsep}{0pt}\setlength{\parskip}{0pt}}
\setcounter{secnumdepth}{0}
% Redefines (sub)paragraphs to behave more like sections
\ifx\paragraph\undefined\else
\let\oldparagraph\paragraph
\renewcommand{\paragraph}[1]{\oldparagraph{#1}\mbox{}}
\fi
\ifx\subparagraph\undefined\else
\let\oldsubparagraph\subparagraph
\renewcommand{\subparagraph}[1]{\oldsubparagraph{#1}\mbox{}}
\fi
\setallmainfonts{Times New Roman}
%\usepackage[mathlines]{lineno}
%\def\linenumberfont{\normalfont\tiny\rmfamily}
%\linenumbers
\usepackage{fancyhdr}
\pagestyle{fancy}
\fancyhead[R]{\thepage}
\fancyhead[L]{Bayesian parameter estimation for a dynamic model of $\feno$}
\fancyfoot{}
\usepackage[width=5in]{caption}
\captionsetup[figure]{name=Fig.}
\usepackage{booktabs}
\usepackage{xcolor}
\usepackage{soul}
\usepackage[nofiglist,notablist]{endfloat}
\usepackage{subfig}
\AtBeginDocument{%
\renewcommand*\figurename{Figure}
\renewcommand*\tablename{Table}
}
\AtBeginDocument{%
\renewcommand*\listfigurename{List of Figures}
\renewcommand*\listtablename{List of Tables}
}
\usepackage{float}
\floatstyle{ruled}
\makeatletter
\@ifundefined{c@chapter}{\newfloat{codelisting}{h}{lop}}{\newfloat{codelisting}{h}{lop}[chapter]}
\makeatother
\floatname{codelisting}{Listing}
\newcommand*\listoflistings{\listof{codelisting}{List of Listings}}

%%% Use protect on footnotes to avoid problems with footnotes in titles
\let\rmarkdownfootnote\footnote%
\def\footnote{\protect\rmarkdownfootnote}

%%% Change title format to be more compact
\usepackage{titling}

% Create subtitle command for use in maketitle
\newcommand{\subtitle}[1]{
  \posttitle{
    \begin{center}\large#1\end{center}
    }
}

\begin{document}

\newcommand{\zzero}{\mathit{z}_0}
\newcommand{\zmouth}{\mathit{z}_\mathrm{mouth}}
\newcommand{\zalv}{\mathit{z}_\mathrm{alv}} 
\newcommand{\tsub}[1]{\mathit{t}_\mathit{#1}}
\newcommand{\csub}[1]{\mathit{c}_\mathit{#1}}
\newcommand{\cof}[2]{\mathit{c(#1,#2)}}
\newcommand{\cofzt}{\cof{z}{t}}
\newcommand{\cofzzeroti}{\mathit{c(\zzero,\tsub{i})}}
\newcommand{\chat}[1]{\hat{\mathit{c}}_\mathit{#1}}
\newcommand{\ctilde}[1]{\tilde{\mathit{c}}_\mathit{#1}}
\newcommand{\voft}{\mathit{v(t)}}
\newcommand{\vhatoft}{\hat{\mathit{v}}\mathit{(t)}}
\newcommand{\diff}{\mathit{d}}
\newcommand{\perm}{\mathit{p}}
\newcommand{\cw}{\csub{w}}
\newcommand{\rad}{\mathit{r}}
\newcommand{\len}{\mathit{l}}
\newcommand{\cano}{\mathrm{Cᴀ_{NO}}}
\newcommand{\feno}{\mathrm{Fᴇ_{NO}}}
\newcommand{\fenoFifty}{\mathrm{Fᴇ_{NO,50}}}
\newcommand{\ceno}{\mathrm{Cᴇ_{NO}}}
\newcommand{\daw}{\mathrm{Daw_{NO}}}
\newcommand{\caw}{\mathrm{Caw_{NO}}}
\newcommand{\jawPrime}{\mathrm{J'aw_{NO}}}
\newcommand{\Vdot}{\dot{\mathrm{V}}}

\newcommand{\pp}[1]{(\partial/\partial #1)}
\newcommand{\ppn}[2]{(\partial^{#2}/\partial {#1}^{#2})}
\newcommand{\timesTenTo}[1]{\times 10^{#1}}

\newcommand{\steadystatesolution}{\jawPrime/\daw+(\cano-\jawPrime/\daw)\exp(-\daw/\Vdot)}
\newcommand{\fof}[1]{"f(#1)}
\newcommand{\fgiven}[2]{"f(#1|#2)}

\newcommand{\pvalue}{$p$-$value$ }
\newcommand{\freqInt}{\textit{conf}}
\newcommand{\bayesInt}{\textit{cred}}

\newcommand{\appendixTitle}[1]{Appendix #1}
\newcommand{\modelAppendix}{\appendixTitle{A}}
\newcommand{\numericalAppendix}{\appendixTitle{B}}
\newcommand{\mcmcAppendix}{\appendixTitle{C}}

\newcommand{\RevisedAdded}[1]{{#1}}
\newcommand{\RevisedRemoved}[1]{}

\section{Supplemental information}\label{supplemental-information}

The dotted lines in Fig. 6 indicate the observed
$\feno$ trajectories for a real CHS participant. Using our novel methodology,
the most likely values for \(\cano\), \(\jawPrime\), and \(\daw\) were
calculated based on these profiles. With these estimates as inputs, the
model was run again, resulting in the dashed lines in Fig. 6. However, 
the values illustrated represent just a sliver of the overall simulation results.

To illustrate the complete model predictions, we have created a series 9
animated profiles, one for each simulated maneuver. To make some details more
apparent, the animations have been slowed to 1/2 speed (the ``Elapsed time:'' at
the bottom of the screen shows the original clock time). The predictions shown
by the animations extend the results shown by Fig. 6 in two ways.

First, the figures only illustrate exhalation, while the complete model also
estimates the airway concentration throughout the preceding inhalation. Each
animated maneuver begins at a negative time, indicating the inhalation phase.
During this period, flow is defined to be negative, and its value is indicated
by the bar on the left. Compared to exhalation, inhalation occurs at a faster
rate, but for a shorter period of time. The inhalation phase ends at time 0,
which is defined by the transition from negative to positive flow (this also
corresponds to time 0 in the panels of Fig. 6).

The predicted $\feno$ profiles in Fig. 6 correspond to
the model solution at a single point (the NO sensor) over time. However,
calculating the solution at this point requires calculating the solution
throughout the length of the airway. Therefore, the second way the animations
extend the figures is by using these values to illustrate the predicted
concentration over the entire domain. This extends from the alveolar boundary to
the NO sensor, providing a way to visualize NO dynamics in otherwise
inaccessible regions.

The color scale is customized to each maneuver. It has been calibrated to range
from 0 ppb (blue) to the maximum observed concentration (red). The maximum value
is largely determined by the target flow rate, so maneuvers targeting different
rates are on widely varying color scales. During the exhalation phase, the
concentration at the alveolar boundary is fixed at $\cano=4.83$ (from Table
2). During the inhalation phase it is allowed to vary,
although it is generally within within 1 or 2 ppb of the $\cano$ estimate.

\end{document}
