# Supplementary material
Source: publisher figshare collection journal article supplement (https://wiley.figshare.com/articles/dataset/_/4872008)

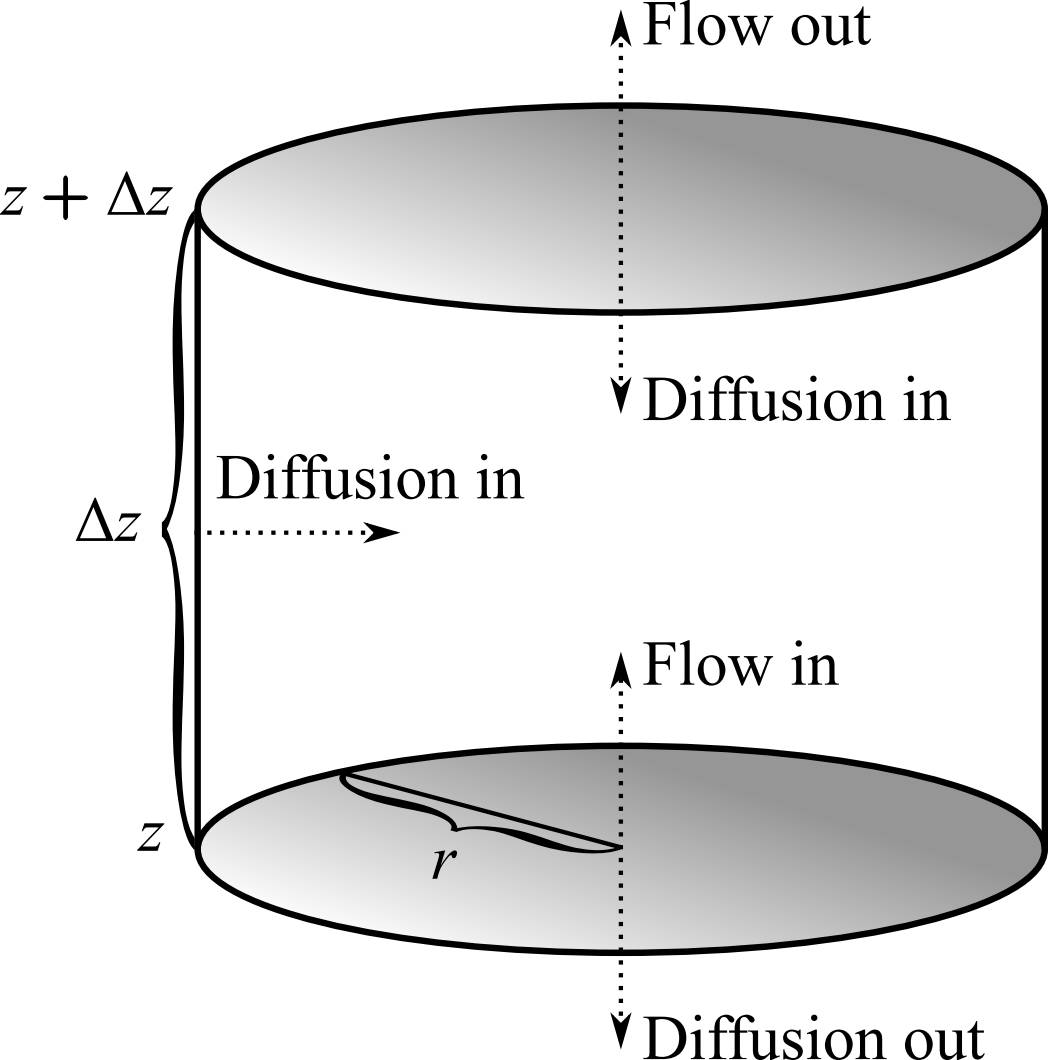

Supplement: Supplementary file 1 [file 1 › AirwaySlice.pdf]
